# Supplementary material for: Rapid estimation of soil water content based on hyperspectral reflectance combined with continuous wavelet transform, feature extraction, and extreme learning machine
Source: PeerJ. 2024 Aug 22;12:e17954. doi: 10.7717/peerj.17954 (PMC11345001; doi:10.7717/peerj.17954)
Supplement: Supplemental Information 2 [file peerj-12-17954-s002.xlsx]

## Sheet: Sheet1
Samples	350	351	352	353	354	355	356	357	358	359	360	361	362	363	364	365	366	367	368	369	370	371	372	373	374	375	376	377	378	379	380	381	382	383	384	385	386	387	388	389	390	391	392	393	394	395	396	397	398
1	1.9711	1.9651	1.9576	1.9498	1.9425	1.9385	1.9352	1.9314	1.9308	1.9337	1.941	1.9483	1.9546	1.9583	1.9603	1.9606	1.9589	1.9565	1.9538	1.9518	1.9512	1.9522	1.9537	1.9555	1.9575	1.9642	1.9728	1.9795	1.9873	1.9951	2.001	2.009	2.0187	2.0286	2.0372	2.0441	2.0492	2.053	2.0564	2.0617	2.0678	2.0742	2.0788	2.0832	2.0888	2.0947	2.0997	2.1022	2.1041
2	1.8755	1.8673	1.857	1.8463	1.8364	1.8316	1.8298	1.8305	1.8352	1.8414	1.8467	1.8535	1.8604	1.8651	1.8651	1.8615	1.8578	1.8539	1.8499	1.8464	1.8447	1.845	1.8463	1.8479	1.8494	1.856	1.8645	1.8709	1.8801	1.892	1.9068	1.9194	1.9298	1.9401	1.9476	1.9521	1.9559	1.9577	1.9575	1.959	1.9637	1.9731	1.983	1.9915	1.9971	2.0036	2.0089	2.0101	2.0115
3	1.9506	1.9445	1.94	1.936	1.9324	1.9274	1.9241	1.9243	1.9294	1.9362	1.9417	1.9444	1.9459	1.9488	1.9502	1.9496	1.9455	1.9429	1.9421	1.9396	1.9379	1.9382	1.9425	1.9478	1.9515	1.9567	1.9636	1.9725	1.982	1.9922	2.0033	2.0142	2.0241	2.031	2.0381	2.0454	2.0496	2.0516	2.0523	2.0566	2.0635	2.073	2.0818	2.0895	2.0957	2.0992	2.1013	2.103	2.1041
4	2.0386	2.0299	2.0221	2.0101	1.9938	1.9859	1.9819	1.9802	1.9814	1.9853	1.9923	2.0033	2.0144	2.0185	2.0203	2.0199	2.0153	2.0115	2.0093	2.0061	2.0039	2.0033	2.0032	2.0047	2.0086	2.0177	2.0283	2.0351	2.0431	2.0511	2.0569	2.0643	2.0729	2.0794	2.0857	2.0918	2.0956	2.0994	2.1044	2.1106	2.1171	2.1236	2.1301	2.1363	2.1419	2.1448	2.147	2.1511	2.1529
5	2.01	2.0075	2.0035	1.996	1.985	1.9795	1.9781	1.981	1.9814	1.982	1.9849	1.9871	1.9889	1.991	1.9911	1.99	1.991	1.9891	1.9841	1.9797	1.9774	1.9777	1.9788	1.9803	1.9814	1.9861	1.9935	2.0023	2.0122	2.0229	2.0347	2.0439	2.0513	2.0594	2.0658	2.0708	2.078	2.0841	2.088	2.0943	2.102	2.111	2.1217	2.1317	2.1393	2.1451	2.1486	2.1487	2.1489
6	2.1096	2.1051	2.099	2.0925	2.0864	2.0813	2.0782	2.0779	2.0791	2.0826	2.0898	2.0936	2.0947	2.0942	2.0927	2.0902	2.0849	2.0809	2.0791	2.0792	2.081	2.0839	2.0874	2.0894	2.0881	2.0915	2.098	2.1056	2.1139	2.1236	2.1358	2.1479	2.1593	2.1689	2.1762	2.181	2.1819	2.1812	2.1808	2.1864	2.1946	2.204	2.2154	2.2264	2.2352	2.2417	2.2458	2.2473	2.2475
7	1.94	1.9362	1.9341	1.9318	1.9288	1.9258	1.924	1.9247	1.9296	1.937	1.9456	1.9502	1.9522	1.9534	1.9524	1.9489	1.9407	1.9348	1.9318	1.9275	1.9245	1.9241	1.9268	1.9311	1.9358	1.9428	1.9511	1.9588	1.9658	1.9724	1.9788	1.9878	1.9986	2.0086	2.0159	2.0204	2.0242	2.0267	2.0284	2.0342	2.0418	2.0505	2.0603	2.0705	2.0803	2.0868	2.0905	2.092	2.0924
8	2.0212	2.0113	2.0011	1.9933	1.9888	1.9839	1.9802	1.9786	1.9829	1.9897	1.9963	2	2.0019	2.0043	2.0037	2.0006	1.9964	1.9933	1.9919	1.9921	1.9928	1.9935	1.996	1.999	2.0016	2.0052	2.0104	2.0184	2.0299	2.0429	2.0541	2.0645	2.0743	2.0845	2.0932	2.1001	2.1032	2.1044	2.1048	2.1065	2.1108	2.1192	2.1253	2.1302	2.1348	2.1381	2.1405	2.1423	2.1445
9	1.9795	1.974	1.9677	1.9611	1.9547	1.9488	1.9477	1.9542	1.9583	1.962	1.9664	1.9698	1.9716	1.9706	1.9679	1.9638	1.9575	1.9514	1.9461	1.9432	1.9422	1.9433	1.9487	1.955	1.9595	1.9648	1.9716	1.9809	1.99	1.9994	2.0106	2.0198	2.0273	2.0355	2.0432	2.0503	2.0562	2.0611	2.0652	2.0703	2.076	2.0823	2.0905	2.0983	2.1041	2.1082	2.1115	2.1156	2.1174
10	2.0264	2.0202	2.0112	2.0047	2.0021	1.9974	1.9937	1.9926	1.9924	1.9948	2.0023	2.0083	2.0132	2.0175	2.0182	2.0159	2.013	2.0111	2.0107	2.0112	2.0118	2.0122	2.0154	2.0184	2.0191	2.0258	2.0347	2.0407	2.0481	2.0567	2.0669	2.0778	2.0887	2.0981	2.1056	2.1115	2.117	2.1192	2.1181	2.1235	2.1325	2.144	2.1535	2.1611	2.167	2.1716	2.1747	2.1767	2.1743
11	2.0081	2.0014	1.9921	1.9813	1.9704	1.9687	1.9712	1.9757	1.9812	1.9876	1.995	2.0026	2.0089	2.011	2.0083	2.0025	1.9977	1.992	1.986	1.9823	1.9813	1.9833	1.9864	1.9896	1.9917	1.9991	2.0089	2.0168	2.0249	2.0331	2.0415	2.0508	2.0607	2.0705	2.0796	2.0873	2.0905	2.0919	2.0934	2.0997	2.1076	2.1159	2.1236	2.1325	2.1435	2.1514	2.157	2.1611	2.1631
12	2.0302	2.0256	2.0181	2.0112	2.0058	1.9999	1.9958	1.9951	1.9996	2.0069	2.0147	2.0201	2.0238	2.0273	2.0275	2.0254	2.0257	2.0234	2.0188	2.0173	2.0173	2.0182	2.021	2.025	2.0293	2.035	2.0424	2.0519	2.0618	2.0715	2.0797	2.0869	2.0938	2.1027	2.1121	2.1209	2.1249	2.1269	2.1288	2.134	2.1413	2.1499	2.1593	2.1685	2.1768	2.184	2.19	2.1943	2.1957
13	1.9876	1.9883	1.9872	1.9845	1.9801	1.9734	1.9691	1.9706	1.9736	1.9773	1.9806	1.9846	1.989	1.9941	1.9957	1.9942	1.9929	1.9894	1.9842	1.9812	1.9788	1.9767	1.9772	1.9785	1.979	1.9833	1.9896	1.9951	2.0006	2.0069	2.0165	2.0257	2.0343	2.043	2.0507	2.0572	2.0636	2.07	2.0766	2.0823	2.0889	2.0975	2.1077	2.1162	2.1208	2.1241	2.1265	2.1289	2.1303
14	1.9939	1.9897	1.9831	1.9775	1.974	1.9698	1.967	1.9669	1.9684	1.972	1.9789	1.9827	1.9845	1.9862	1.9857	1.9837	1.9834	1.9819	1.9793	1.9783	1.978	1.9781	1.9808	1.9844	1.9875	1.9918	1.9968	2.0014	2.0091	2.0198	2.0343	2.0453	2.0537	2.0633	2.0729	2.0819	2.0879	2.0902	2.0888	2.0897	2.094	2.1031	2.1125	2.1215	2.1291	2.1349	2.1395	2.144	2.1454
15	2.046	2.0439	2.0408	2.0352	2.027	2.0227	2.0223	2.0265	2.0286	2.0307	2.0349	2.0377	2.0391	2.0394	2.0378	2.0354	2.0357	2.0339	2.0298	2.027	2.0267	2.0294	2.0322	2.035	2.0372	2.041	2.0469	2.0554	2.064	2.0729	2.0832	2.0913	2.0979	2.1063	2.1131	2.1181	2.1238	2.1295	2.1351	2.1413	2.1497	2.161	2.1722	2.1821	2.1898	2.1949	2.1974	2.1973	2.1967
16	2.3334	2.3275	2.3227	2.3164	2.3084	2.3025	2.3006	2.3043	2.3089	2.3138	2.3181	2.3237	2.3298	2.3356	2.3359	2.3317	2.3273	2.3244	2.323	2.318	2.3146	2.3148	2.3195	2.3256	2.3308	2.3396	2.3504	2.3608	2.3733	2.3878	2.4052	2.4206	2.4334	2.4436	2.4532	2.4625	2.4691	2.4747	2.4804	2.487	2.4966	2.5106	2.5248	2.5381	2.5493	2.558	2.5651	2.5716	2.5769
17	2.0324	2.028	2.022	2.0163	2.0116	2.0087	2.0066	2.0051	2.0087	2.0152	2.0231	2.0302	2.0362	2.0399	2.041	2.0401	2.0379	2.0367	2.0366	2.0364	2.036	2.0356	2.0371	2.0409	2.0472	2.0547	2.0622	2.0679	2.0745	2.082	2.0896	2.0992	2.11	2.1193	2.1258	2.1296	2.1336	2.1362	2.1377	2.1426	2.1487	2.1552	2.164	2.1731	2.1808	2.188	2.1931	2.1937	2.1944
18	1.9574	1.9488	1.9387	1.9293	1.9216	1.9133	1.9098	1.9144	1.9182	1.9229	1.9305	1.9338	1.9346	1.9362	1.9358	1.9335	1.9292	1.9267	1.9265	1.9254	1.9247	1.9249	1.9287	1.9335	1.9369	1.9424	1.9485	1.9525	1.9624	1.9753	1.9869	1.9979	2.0079	2.0159	2.0231	2.0297	2.0356	2.0384	2.0379	2.0384	2.0432	2.0549	2.0651	2.0741	2.0818	2.0874	2.0913	2.0946	2.0966
19	2.2598	2.2538	2.2462	2.2381	2.2302	2.2259	2.2257	2.2307	2.2354	2.2409	2.2484	2.2558	2.2617	2.2641	2.2636	2.2608	2.2568	2.2528	2.2492	2.2459	2.2454	2.2485	2.2537	2.2607	2.2691	2.2798	2.2916	2.3029	2.3115	2.3203	2.335	2.3469	2.3563	2.3668	2.376	2.3838	2.3914	2.3985	2.4054	2.4138	2.4229	2.4324	2.4481	2.4627	2.4705	2.4779	2.4837	2.4869	2.4886
20	2.1324	2.1261	2.1218	2.1183	2.1156	2.1132	2.1134	2.1178	2.119	2.1202	2.1244	2.1293	2.1333	2.1341	2.1328	2.1302	2.1264	2.1254	2.1274	2.1267	2.1263	2.127	2.1274	2.1295	2.1346	2.1422	2.1495	2.1526	2.1565	2.1625	2.1725	2.1836	2.1947	2.2051	2.2135	2.2197	2.2233	2.2272	2.233	2.2392	2.2454	2.2512	2.2597	2.2688	2.2769	2.2822	2.285	2.2861	2.2847
21	1.9092	1.9032	1.8993	1.8943	1.8878	1.8845	1.8847	1.8891	1.8936	1.8989	1.9057	1.9124	1.9182	1.9224	1.9227	1.9203	1.9186	1.9177	1.9172	1.9154	1.9132	1.9113	1.9123	1.9146	1.9166	1.9232	1.9318	1.9389	1.9471	1.9559	1.9648	1.972	1.9778	1.9843	1.9892	1.9923	1.9946	1.9974	2.0016	2.0088	2.0185	2.0308	2.0416	2.0501	2.0554	2.0601	2.0634	2.0648	2.0643
22	2.0189	2.0129	2.0067	2.0003	1.9939	1.9872	1.9851	1.9909	1.9946	1.9972	1.9988	2.0045	2.0109	2.0119	2.0117	2.0103	2.0054	2.0016	1.9996	1.999	1.9991	1.9998	2.0038	2.0073	2.0073	2.0122	2.0198	2.0263	2.0379	2.0515	2.0629	2.0726	2.0812	2.0908	2.0984	2.1035	2.1067	2.1087	2.1104	2.1134	2.1202	2.1324	2.1442	2.1544	2.1617	2.1688	2.1742	2.176	2.1775
23	1.9534	1.9492	1.9441	1.9385	1.9329	1.9282	1.9253	1.9251	1.9257	1.929	1.9374	1.9451	1.9515	1.9554	1.9549	1.9512	1.9486	1.9457	1.9425	1.9402	1.9391	1.9396	1.9432	1.9482	1.9532	1.9607	1.9687	1.9742	1.9803	1.9883	2.0007	2.0111	2.0198	2.03	2.0362	2.0383	2.04	2.0423	2.0457	2.0498	2.0558	2.0645	2.0747	2.0835	2.0886	2.0936	2.0969	2.0966	2.0955
24	1.841	1.8383	1.8341	1.8276	1.8189	1.8138	1.8108	1.8097	1.813	1.818	1.8225	1.8265	1.8293	1.8294	1.8288	1.8281	1.8282	1.8274	1.825	1.8205	1.8188	1.8217	1.8223	1.8243	1.8304	1.8388	1.8481	1.8565	1.8666	1.8775	1.8877	1.8967	1.9046	1.9119	1.9182	1.9231	1.925	1.9275	1.932	1.9377	1.9454	1.9557	1.9665	1.9761	1.9833	1.9888	1.9919	1.9917	1.9911
25	2.004	2.0004	1.9984	1.9928	1.9827	1.9781	1.9742	1.9691	1.9692	1.9721	1.9757	1.9827	1.9904	1.9949	1.9959	1.9942	1.9918	1.9913	1.993	1.9932	1.9958	2.002	2.0045	2.0069	2.0117	2.0197	2.0282	2.0327	2.0396	2.0476	2.0543	2.0627	2.0719	2.0785	2.0843	2.0892	2.0916	2.0951	2.1011	2.1055	2.1126	2.1248	2.1363	2.1465	2.1546	2.1584	2.1597	2.1612	2.1617
26	2.0612	2.0568	2.0519	2.0445	2.0343	2.0277	2.0233	2.0208	2.0204	2.0223	2.0267	2.0301	2.0325	2.0345	2.0336	2.031	2.0319	2.0334	2.0349	2.0348	2.0353	2.0372	2.04	2.0434	2.0472	2.0509	2.0558	2.0632	2.0685	2.0744	2.0865	2.0986	2.1103	2.1223	2.1308	2.1355	2.1393	2.1431	2.1473	2.1502	2.1535	2.1583	2.1678	2.1777	2.1849	2.1916	2.1969	2.1994	2.2013
27	1.9787	1.9748	1.9702	1.9652	1.9597	1.9536	1.9478	1.9426	1.9413	1.9441	1.9521	1.9589	1.9639	1.9666	1.9696	1.9723	1.9719	1.9712	1.9709	1.9705	1.9703	1.9704	1.97	1.9708	1.9743	1.9814	1.9904	1.999	2.0092	2.0204	2.0315	2.0419	2.0513	2.0594	2.0657	2.0702	2.0731	2.0761	2.0799	2.0827	2.0877	2.0968	2.1059	2.1146	2.1226	2.1287	2.133	2.1361	2.137
28	2.0753	2.0744	2.073	2.07	2.0652	2.0621	2.0596	2.0573	2.0554	2.0554	2.0589	2.0641	2.069	2.0708	2.0707	2.0695	2.0683	2.0666	2.0643	2.0595	2.0566	2.0573	2.0573	2.0575	2.0583	2.064	2.0719	2.0781	2.0878	2.0998	2.1124	2.1242	2.1353	2.1462	2.1566	2.1656	2.1689	2.1705	2.1724	2.1726	2.1763	2.1869	2.1976	2.2077	2.2167	2.225	2.2313	2.2342	2.2345
29	2.406	2.4002	2.3891	2.3782	2.3694	2.3634	2.361	2.3628	2.3628	2.3656	2.3763	2.3886	2.4006	2.4088	2.4121	2.4111	2.4077	2.4019	2.395	2.3917	2.3915	2.394	2.3986	2.4042	2.4097	2.4223	2.4382	2.452	2.464	2.4757	2.4905	2.5027	2.5135	2.5279	2.5412	2.5528	2.5632	2.571	2.5762	2.5837	2.5927	2.6033	2.6148	2.626	2.6363	2.6495	2.6621	2.6694	2.6759
30	2.4928	2.4881	2.4828	2.4763	2.4687	2.4621	2.4602	2.466	2.4711	2.4775	2.4872	2.4967	2.5036	2.5037	2.5013	2.4969	2.4905	2.4854	2.482	2.4771	2.4753	2.4782	2.4806	2.4869	2.5005	2.5153	2.5297	2.5413	2.5548	2.57	2.5864	2.6044	2.6225	2.6374	2.6501	2.6601	2.6608	2.6634	2.6717	2.6746	2.6802	2.6928	2.71	2.7272	2.7406	2.7541	2.7658	2.7736	2.7751
31	2.369	2.3631	2.3562	2.3474	2.337	2.3303	2.3264	2.325	2.3311	2.3401	2.3481	2.3566	2.3642	2.3685	2.3702	2.37	2.3696	2.368	2.3653	2.363	2.3617	2.362	2.3645	2.3694	2.3769	2.388	2.4	2.4083	2.4203	2.4353	2.4533	2.4675	2.4789	2.4931	2.5054	2.515	2.5232	2.5308	2.538	2.5428	2.5503	2.5638	2.5782	2.5905	2.5983	2.6062	2.6131	2.6177	2.6207
32	2.4202	2.4175	2.411	2.4043	2.3989	2.3941	2.3917	2.3927	2.3979	2.4042	2.4084	2.4123	2.4158	2.4179	2.4197	2.4205	2.4177	2.4129	2.4073	2.4058	2.4071	2.4106	2.4144	2.4204	2.4297	2.439	2.4493	2.4619	2.4743	2.4878	2.5054	2.5199	2.5317	2.5441	2.555	2.5639	2.5684	2.5745	2.5841	2.5891	2.5957	2.6077	2.6241	2.6403	2.6526	2.663	2.6718	2.6798	2.6841
33	2.2335	2.2281	2.2194	2.2116	2.206	2.201	2.1988	2.2009	2.2052	2.2116	2.2204	2.2286	2.235	2.2378	2.2382	2.2366	2.2328	2.2294	2.2268	2.2253	2.2241	2.2228	2.2241	2.2269	2.2303	2.2359	2.2423	2.2478	2.257	2.2693	2.2843	2.2984	2.3114	2.3242	2.3333	2.3384	2.3427	2.3452	2.346	2.3462	2.3493	2.3578	2.3699	2.3821	2.3916	2.4007	2.4081	2.4125	2.4157
34	2.4551	2.4555	2.453	2.4483	2.4419	2.435	2.4316	2.4343	2.4354	2.4387	2.4479	2.455	2.4602	2.4632	2.464	2.4627	2.4601	2.4567	2.4531	2.4497	2.4488	2.4514	2.4563	2.4615	2.465	2.4735	2.4851	2.4972	2.5117	2.5277	2.5444	2.5605	2.5751	2.5863	2.5969	2.607	2.6139	2.6189	2.6229	2.6295	2.6391	2.6527	2.669	2.6853	2.6998	2.712	2.7216	2.7287	2.7323
35	2.8176	2.81	2.7994	2.791	2.7859	2.7738	2.7636	2.7602	2.7636	2.7704	2.7775	2.788	2.7982	2.8018	2.8006	2.7957	2.7893	2.7824	2.7757	2.7711	2.7664	2.7613	2.7637	2.7712	2.7821	2.8008	2.8223	2.8396	2.8584	2.8791	2.9024	2.9237	2.9428	2.9601	2.9729	2.9815	2.9882	2.9948	3.0022	3.01	3.0212	3.0377	3.0569	3.0758	3.0922	3.1047	3.1138	3.1205	3.1241
36	2.1884	2.1814	2.1749	2.1672	2.1582	2.1531	2.1501	2.1488	2.1502	2.154	2.1603	2.1662	2.1713	2.1752	2.1764	2.1753	2.1727	2.1693	2.1658	2.164	2.1629	2.1626	2.1649	2.169	2.1742	2.1816	2.1909	2.2019	2.2135	2.226	2.2406	2.2529	2.2633	2.2732	2.2812	2.2872	2.2916	2.2947	2.2971	2.3033	2.312	2.323	2.3352	2.3467	2.3561	2.3628	2.3675	2.3709	2.3724
37	2.2266	2.2188	2.2127	2.2053	2.1957	2.1884	2.1831	2.1802	2.1866	2.1956	2.2012	2.2063	2.2113	2.2174	2.2194	2.2179	2.2146	2.2118	2.2098	2.2051	2.2011	2.1994	2.2011	2.2052	2.2107	2.2175	2.225	2.2321	2.2426	2.2541	2.2624	2.2729	2.2849	2.2966	2.3053	2.3108	2.3167	2.3212	2.324	2.3274	2.3338	2.345	2.3536	2.3622	2.3722	2.3808	2.3868	2.3881	2.3878
38	2.0395	2.0377	2.0351	2.0337	2.0337	2.0304	2.0281	2.0293	2.0289	2.0299	2.0356	2.0382	2.039	2.04	2.04	2.0387	2.0348	2.0317	2.0304	2.0319	2.0343	2.0366	2.0398	2.0428	2.0444	2.051	2.0596	2.0656	2.0729	2.0816	2.0927	2.1029	2.1118	2.1193	2.1264	2.1328	2.136	2.1382	2.1405	2.1443	2.1501	2.1582	2.1681	2.1771	2.1835	2.1865	2.1878	2.1899	2.1894
39	2.2576	2.2516	2.2416	2.2327	2.226	2.2172	2.2115	2.2122	2.2158	2.2216	2.2289	2.2378	2.2466	2.2525	2.2543	2.2528	2.2511	2.2469	2.2404	2.2349	2.2304	2.2273	2.2284	2.2321	2.2369	2.245	2.2555	2.2671	2.2793	2.2927	2.3082	2.3227	2.3361	2.3494	2.3596	2.3667	2.3733	2.3772	2.3783	2.3821	2.3891	2.4004	2.413	2.4258	2.4382	2.4482	2.4558	2.4609	2.4639
40	2.5494	2.5448	2.5404	2.5318	2.5188	2.5133	2.5091	2.5034	2.5043	2.5104	2.5217	2.5286	2.5336	2.5415	2.5451	2.5446	2.541	2.5372	2.5342	2.5321	2.5311	2.5311	2.5271	2.5262	2.5332	2.5415	2.5526	2.5683	2.5834	2.5981	2.6124	2.628	2.645	2.6642	2.6783	2.6866	2.6931	2.7008	2.7109	2.7213	2.7328	2.746	2.7577	2.7685	2.7787	2.7878	2.7954	2.8007	2.8031
41	2.582	2.5781	2.5699	2.5606	2.5514	2.5417	2.5334	2.5276	2.5291	2.5352	2.5443	2.5489	2.5515	2.5572	2.5615	2.5641	2.5658	2.5653	2.5628	2.5584	2.5573	2.5614	2.5634	2.5665	2.5728	2.5818	2.5934	2.607	2.6249	2.6454	2.6663	2.686	2.7043	2.7211	2.7347	2.7443	2.7471	2.7477	2.7482	2.7484	2.753	2.7651	2.7789	2.7923	2.8036	2.8143	2.8233	2.8288	2.8341
42	2.733	2.7315	2.7263	2.7191	2.7108	2.7065	2.7054	2.7078	2.7143	2.7232	2.7327	2.7438	2.7542	2.7608	2.7607	2.7568	2.7596	2.7602	2.7576	2.7562	2.7575	2.7619	2.7622	2.764	2.7711	2.7803	2.7913	2.8032	2.8156	2.8297	2.8486	2.8659	2.8821	2.9014	2.9174	2.9291	2.9375	2.9446	2.9515	2.9572	2.9664	2.9823	2.9966	3.0107	3.0255	3.0399	3.0522	3.0596	3.0656
43	2.1159	2.1117	2.1082	2.1014	2.0907	2.0841	2.0798	2.0777	2.0788	2.0824	2.0882	2.0917	2.0941	2.0979	2.099	2.0976	2.0946	2.0918	2.0897	2.0879	2.0875	2.0891	2.0905	2.0933	2.0985	2.1055	2.1137	2.1223	2.1313	2.1403	2.1489	2.1593	2.1709	2.1816	2.1892	2.1937	2.1967	2.1991	2.2015	2.207	2.2146	2.2242	2.2354	2.2473	2.2588	2.2675	2.2735	2.2767	2.2779
44	2.3251	2.3216	2.3174	2.312	2.3059	2.3013	2.3002	2.3041	2.3093	2.3155	2.3221	2.3288	2.3348	2.339	2.3398	2.3375	2.3332	2.3274	2.3208	2.3156	2.3129	2.3133	2.3174	2.3235	2.3302	2.3407	2.3526	2.3627	2.3741	2.3867	2.4013	2.4135	2.4239	2.4349	2.4447	2.4527	2.4576	2.4606	2.4624	2.4644	2.4697	2.4807	2.4933	2.505	2.5141	2.522	2.5287	2.5344	2.5368
45	2.3554	2.3505	2.3436	2.3399	2.3409	2.3383	2.3378	2.3427	2.3477	2.3537	2.3616	2.3685	2.3741	2.3776	2.3782	2.376	2.3702	2.3651	2.3615	2.3578	2.3554	2.3548	2.3587	2.3639	2.3677	2.3754	2.3861	2.3987	2.4104	2.4222	2.4364	2.4486	2.4585	2.4667	2.4735	2.4791	2.4828	2.4874	2.4941	2.5025	2.5133	2.5271	2.5429	2.5572	2.5676	2.5754	2.581	2.5845	2.5854
46	2.7796	2.7791	2.7747	2.7671	2.7563	2.7443	2.7374	2.7397	2.7412	2.7456	2.7568	2.7624	2.7656	2.7722	2.7759	2.7769	2.777	2.7739	2.768	2.7645	2.7634	2.7649	2.7704	2.7767	2.7815	2.7906	2.8026	2.8153	2.8282	2.8414	2.8558	2.8707	2.8861	2.9023	2.9163	2.9279	2.9394	2.9498	2.9589	2.97	2.984	3.002	3.0231	3.0436	3.0608	3.072	3.0791	3.0853	3.0884
47	2.1593	2.1559	2.1516	2.1472	2.1431	2.137	2.1332	2.1341	2.1359	2.1399	2.1476	2.1544	2.1596	2.162	2.163	2.1627	2.1596	2.157	2.1555	2.1529	2.1504	2.1487	2.1501	2.1527	2.1548	2.1611	2.1696	2.1774	2.1878	2.1994	2.2098	2.2201	2.2299	2.2384	2.2445	2.2484	2.2539	2.2574	2.2582	2.2611	2.2678	2.28	2.2926	2.304	2.3128	2.3195	2.3245	2.3278	2.3301
48	2.1643	2.1614	2.1589	2.1569	2.1557	2.1557	2.1546	2.1512	2.1525	2.1569	2.1638	2.1698	2.1753	2.1813	2.1848	2.1857	2.1838	2.1821	2.1813	2.1802	2.1779	2.1743	2.1731	2.1728	2.1723	2.1754	2.1825	2.194	2.2033	2.2111	2.219	2.2264	2.2338	2.2439	2.2524	2.2585	2.2617	2.2639	2.2662	2.273	2.2812	2.2892	2.2982	2.3069	2.3146	2.3216	2.3271	2.3305	2.3309
49	1.8815	1.8746	1.8681	1.8621	1.8568	1.851	1.846	1.8431	1.846	1.8527	1.8619	1.8682	1.8716	1.8715	1.8704	1.8685	1.8663	1.865	1.8643	1.8622	1.8607	1.8605	1.8616	1.8625	1.8624	1.8664	1.8718	1.8745	1.8795	1.8863	1.8942	1.9044	1.9155	1.9235	1.9312	1.9388	1.9435	1.9436	1.9394	1.9402	1.9424	1.9445	1.9506	1.9586	1.9668	1.9719	1.9754	1.9794	1.9815
50	1.9126	1.9088	1.9036	1.9003	1.8997	1.8974	1.8955	1.8951	1.8957	1.8981	1.9039	1.9059	1.9056	1.9056	1.9064	1.9074	1.906	1.9042	1.9029	1.9038	1.9058	1.9084	1.9081	1.9074	1.9081	1.9112	1.9154	1.9187	1.9261	1.9357	1.9444	1.9526	1.9607	1.9699	1.9776	1.9835	1.9876	1.9904	1.9921	1.9912	1.9927	1.9996	2.0057	2.012	2.019	2.0243	2.0289	2.0339	2.0376
51	1.8765	1.87	1.8651	1.8606	1.8563	1.8515	1.8488	1.8497	1.8467	1.8447	1.8481	1.8501	1.8506	1.8493	1.8488	1.8489	1.8472	1.8479	1.8512	1.8526	1.8537	1.855	1.8568	1.8592	1.862	1.8676	1.8739	1.8783	1.8851	1.8932	1.9009	1.9081	1.915	1.9226	1.9283	1.9317	1.9318	1.9324	1.9348	1.9349	1.9361	1.9403	1.9457	1.9507	1.9538	1.9586	1.9631	1.9647	1.9649
52	2.511	2.5039	2.4947	2.4855	2.4774	2.4723	2.47	2.4704	2.4744	2.4803	2.4867	2.4944	2.5017	2.5056	2.506	2.5038	2.5022	2.4987	2.4938	2.4948	2.4969	2.4985	2.5018	2.5056	2.5091	2.5163	2.5264	2.5388	2.5523	2.5669	2.5824	2.596	2.6087	2.626	2.6401	2.6493	2.6529	2.6543	2.6558	2.6638	2.6739	2.684	2.6947	2.7054	2.7159	2.7252	2.7323	2.7357	2.735
53	2.2481	2.2463	2.2402	2.2347	2.2315	2.228	2.2266	2.229	2.229	2.2303	2.2364	2.2435	2.2506	2.257	2.2595	2.2589	2.2589	2.2576	2.2551	2.254	2.2542	2.2555	2.2569	2.2582	2.2589	2.2667	2.2793	2.294	2.3062	2.3177	2.3315	2.3441	2.355	2.3638	2.3706	2.3752	2.3756	2.3753	2.3763	2.3824	2.3904	2.3986	2.4075	2.4159	2.423	2.4301	2.4364	2.4405	2.4422
54	1.779	1.7762	1.7721	1.7688	1.7665	1.7627	1.7602	1.7608	1.7629	1.7665	1.7717	1.7756	1.7783	1.7802	1.7788	1.7753	1.7733	1.7696	1.7647	1.7658	1.7661	1.763	1.7626	1.7634	1.7642	1.7667	1.7712	1.7784	1.7842	1.7892	1.7945	1.7987	1.8027	1.8109	1.8142	1.812	1.8112	1.811	1.8118	1.8171	1.8237	1.8297	1.8356	1.8418	1.8487	1.8553	1.8601	1.8611	1.8615
55	1.9115	1.9069	1.903	1.8992	1.8954	1.8899	1.8873	1.8904	1.8942	1.8991	1.905	1.9091	1.9118	1.9139	1.914	1.9124	1.9094	1.9053	1.9004	1.8975	1.8955	1.8943	1.8976	1.9026	1.9073	1.9136	1.92	1.9244	1.9323	1.942	1.9507	1.9563	1.9606	1.9703	1.9792	1.9863	1.9911	1.9939	1.9949	1.9969	2.0015	2.0102	2.0168	2.0227	2.0289	2.0357	2.0419	2.0457	2.0476
56	2.8	2.7922	2.7867	2.78	2.7717	2.7675	2.7654	2.7644	2.7693	2.7778	2.7889	2.8006	2.8108	2.816	2.8147	2.8087	2.8023	2.7962	2.791	2.7898	2.7892	2.7877	2.7878	2.792	2.8025	2.8154	2.8318	2.8533	2.8697	2.884	2.9011	2.9165	2.9309	2.9484	2.9615	2.9689	2.9719	2.9755	2.982	2.9897	2.9979	3.0061	3.0203	3.0367	3.0529	3.0681	3.0816	3.0928	3.0988
57	1.9821	1.9778	1.9719	1.9662	1.9609	1.9542	1.9499	1.9503	1.9514	1.9532	1.9559	1.9558	1.9555	1.9599	1.9611	1.9594	1.9574	1.9551	1.9529	1.9509	1.9515	1.9557	1.9611	1.9658	1.9682	1.9731	1.9801	1.9887	1.9973	2.0055	2.0119	2.0196	2.0286	2.0384	2.0469	2.0534	2.0564	2.0573	2.057	2.0607	2.0669	2.0752	2.084	2.0925	2.1003	2.1063	2.1098	2.1098	2.1092
58	2.0205	2.0162	2.0111	2.0055	1.9999	1.9963	1.9959	1.9995	2.0008	2.0017	2.0042	2.0073	2.01	2.0109	2.0109	2.0096	2.0052	2.0005	1.9966	1.9949	1.994	1.9932	1.9971	2.0026	2.008	2.0154	2.024	2.0325	2.0376	2.0416	2.0484	2.0555	2.0624	2.0687	2.0754	2.0824	2.0863	2.091	2.0974	2.0997	2.1014	2.1046	2.1106	2.118	2.1257	2.1318	2.1364	2.1395	2.1403
59	1.922	1.9163	1.9135	1.9066	1.8943	1.8873	1.8841	1.885	1.8879	1.893	1.9012	1.907	1.9109	1.914	1.9136	1.9105	1.9066	1.9035	1.9015	1.899	1.8976	1.8978	1.901	1.9058	1.9111	1.9178	1.9253	1.933	1.9379	1.942	1.9493	1.956	1.9622	1.9684	1.975	1.9814	1.9838	1.9875	1.9943	1.9992	2.0041	2.0098	2.0172	2.0243	2.0296	2.0348	2.0396	2.0434	2.0449
60	2.0611	2.0583	2.0526	2.0462	2.0402	2.0383	2.0386	2.0401	2.0433	2.0474	2.0519	2.0563	2.0599	2.0613	2.0617	2.061	2.0586	2.0546	2.0493	2.0429	2.039	2.039	2.041	2.0447	2.0495	2.0569	2.0654	2.0725	2.0803	2.0889	2.0991	2.108	2.1159	2.1256	2.1334	2.1391	2.1443	2.1486	2.1523	2.156	2.1605	2.1662	2.1738	2.1824	2.1914	2.1988	2.2044	2.2081	2.2103
61	1.3911	1.3889	1.3868	1.3849	1.3832	1.3809	1.3796	1.3804	1.3803	1.3805	1.3819	1.3838	1.3851	1.3835	1.3801	1.3758	1.3724	1.3713	1.3723	1.3735	1.3741	1.3741	1.3763	1.379	1.381	1.3849	1.3899	1.3952	1.3993	1.4045	1.4149	1.424	1.4309	1.4345	1.4364	1.4374	1.439	1.4397	1.4394	1.4413	1.4446	1.4493	1.4582	1.4666	1.471	1.4732	1.4739	1.4736	1.4738
62	2.2431	2.2391	2.2325	2.226	2.2207	2.2196	2.2211	2.2248	2.226	2.228	2.234	2.2396	2.2445	2.2492	2.2477	2.2425	2.2426	2.2402	2.235	2.2348	2.2351	2.2344	2.2344	2.2341	2.2326	2.2351	2.2405	2.2474	2.2549	2.2648	2.2816	2.295	2.3054	2.3169	2.3244	2.3276	2.3299	2.3309	2.3314	2.3344	2.3405	2.35	2.3617	2.3729	2.3815	2.3873	2.3908	2.3927	2.393
63	2.1153	2.1134	2.109	2.1032	2.097	2.0969	2.0979	2.0971	2.0997	2.1044	2.1112	2.1168	2.1207	2.1216	2.1212	2.1199	2.1175	2.1134	2.108	2.103	2.101	2.1029	2.1032	2.1049	2.1096	2.1156	2.1224	2.1292	2.1371	2.1465	2.1582	2.1698	2.1808	2.1912	2.1986	2.2028	2.2044	2.2055	2.2071	2.2105	2.2157	2.2231	2.2333	2.2433	2.2511	2.2563	2.2591	2.2592	2.2579
64	2.6186	2.613	2.6068	2.6029	2.6016	2.5956	2.5927	2.5975	2.6012	2.6063	2.6154	2.6253	2.6348	2.6423	2.645	2.6438	2.6399	2.6369	2.6356	2.6349	2.6346	2.6343	2.6375	2.6421	2.6466	2.6562	2.6678	2.6775	2.6888	2.7015	2.716	2.7306	2.7442	2.7548	2.7639	2.7718	2.7776	2.7819	2.7852	2.789	2.7966	2.8102	2.8242	2.8378	2.8503	2.8583	2.8631	2.8662	2.8681
65	3.4248	3.421	3.4138	3.4069	3.4018	3.3965	3.3921	3.3894	3.3971	3.4103	3.4258	3.4405	3.4536	3.4638	3.4687	3.4699	3.473	3.4707	3.4629	3.4565	3.454	3.4565	3.4575	3.4594	3.4639	3.472	3.4837	3.499	3.5172	3.5383	3.5642	3.5842	3.6002	3.6213	3.6426	3.6626	3.6784	3.6879	3.6913	3.7008	3.7121	3.7234	3.7397	3.7567	3.771	3.7848	3.7982	3.8115	3.8219
66	2.3013	2.2974	2.2947	2.2916	2.288	2.2874	2.2891	2.2932	2.2952	2.2968	2.2993	2.3039	2.3082	2.3072	2.3044	2.3008	2.2981	2.2964	2.2955	2.2944	2.2954	2.2995	2.3046	2.3096	2.3133	2.3193	2.326	2.331	2.3367	2.3433	2.3511	2.36	2.3695	2.3782	2.3849	2.3893	2.3922	2.3954	2.3999	2.4047	2.411	2.4196	2.4296	2.4402	2.4508	2.4585	2.4632	2.465	2.4646
67	2.2532	2.2482	2.2402	2.2321	2.2249	2.2189	2.2161	2.2181	2.2213	2.2245	2.2257	2.2332	2.2421	2.2445	2.2427	2.2385	2.2361	2.2331	2.2299	2.2309	2.2327	2.2341	2.2361	2.2385	2.241	2.248	2.2575	2.267	2.2779	2.2894	2.3009	2.3116	2.3215	2.3304	2.3373	2.3422	2.3456	2.3475	2.3488	2.3546	2.3625	2.3715	2.3812	2.3905	2.3986	2.4053	2.411	2.4162	2.4183
68	3.1749	3.1724	3.1639	3.154	3.1444	3.1376	3.1297	3.1186	3.1178	3.1235	3.1327	3.1468	3.1615	3.17	3.174	3.1746	3.1746	3.1707	3.1641	3.1638	3.1659	3.1691	3.1714	3.1742	3.1786	3.1902	3.2061	3.2224	3.2364	3.2499	3.2674	3.2811	3.2932	3.3134	3.3317	3.3463	3.3584	3.3689	3.3792	3.3941	3.4097	3.4242	3.4436	3.4622	3.476	3.4909	3.5041	3.5119	3.5173
69	2.1133	2.113	2.1083	2.1016	2.0938	2.0875	2.0831	2.0815	2.0837	2.0877	2.0916	2.094	2.0957	2.0984	2.0994	2.099	2.0984	2.0949	2.0888	2.0848	2.0822	2.0808	2.0839	2.0884	2.0918	2.0968	2.103	2.1095	2.1184	2.1297	2.1439	2.1547	2.1628	2.172	2.1799	2.1864	2.1935	2.1976	2.1978	2.199	2.2034	2.2127	2.2233	2.2321	2.2368	2.2399	2.2417	2.2427	2.2432
70	2.0756	2.0702	2.0686	2.0642	2.0555	2.0501	2.0478	2.0491	2.0469	2.0472	2.0565	2.0621	2.0653	2.0688	2.0698	2.0686	2.0664	2.0651	2.0648	2.063	2.0611	2.0601	2.0628	2.0657	2.0661	2.0711	2.0787	2.0864	2.0934	2.1009	2.1114	2.1194	2.1258	2.1361	2.1429	2.1457	2.1511	2.1551	2.1569	2.1607	2.1653	2.1703	2.175	2.1799	2.1848	2.1907	2.1955	2.1961	2.1972
71	2.1207	2.1228	2.1185	2.1128	2.107	2.1009	2.0956	2.092	2.0904	2.0915	2.0963	2.0992	2.1016	2.1062	2.1083	2.1086	2.1107	2.1086	2.1026	2.1	2.0995	2.1008	2.1054	2.1102	2.1126	2.1169	2.1221	2.1263	2.1345	2.1442	2.152	2.1572	2.1616	2.1709	2.1797	2.1873	2.1945	2.1998	2.2028	2.2054	2.2113	2.2229	2.2317	2.2384	2.2433	2.2482	2.2522	2.2541	2.2541
72	2.185	2.1795	2.1746	2.1669	2.1563	2.1512	2.1496	2.1509	2.1554	2.1617	2.1689	2.1735	2.1759	2.1767	2.1753	2.1722	2.1687	2.1662	2.1648	2.1631	2.1611	2.1589	2.1615	2.1659	2.1701	2.175	2.1813	2.1902	2.1977	2.205	2.2142	2.2215	2.2273	2.2343	2.24	2.2443	2.2491	2.2523	2.2538	2.2587	2.2658	2.275	2.2843	2.2928	2.2998	2.3054	2.3098	2.3135	2.3154
73	2.102	2.0991	2.0954	2.0928	2.0919	2.0911	2.091	2.092	2.0948	2.0987	2.1038	2.1093	2.1139	2.1153	2.1156	2.1145	2.1093	2.1051	2.1031	2.1029	2.1035	2.1044	2.1073	2.1113	2.1156	2.1234	2.1316	2.1357	2.1419	2.149	2.1552	2.1618	2.1688	2.176	2.1829	2.1892	2.1925	2.1953	2.1985	2.2028	2.2088	2.2174	2.227	2.2355	2.2414	2.2494	2.2576	2.2635	2.2666
74	2.0939	2.0883	2.0833	2.0778	2.0715	2.0661	2.0624	2.0613	2.0646	2.0693	2.0722	2.0788	2.086	2.0887	2.0879	2.0847	2.0807	2.0778	2.0767	2.0779	2.0792	2.0795	2.0814	2.084	2.0866	2.093	2.1006	2.106	2.1124	2.1202	2.1304	2.1398	2.1483	2.157	2.1638	2.1682	2.1706	2.1721	2.1734	2.1759	2.181	2.1899	2.2013	2.2114	2.2174	2.2231	2.2278	2.2304	2.2303
75	2.1009	2.1003	2.0964	2.0941	2.0944	2.0904	2.0869	2.0868	2.0885	2.0914	2.0948	2.0963	2.0969	2.0992	2.0982	2.0945	2.0907	2.0877	2.0858	2.0864	2.0868	2.0864	2.0901	2.0938	2.0945	2.0962	2.1002	2.1089	2.116	2.1228	2.1323	2.1421	2.1516	2.1603	2.1662	2.1691	2.1707	2.1697	2.1665	2.169	2.1743	2.1811	2.1891	2.1967	2.2029	2.2096	2.2151	2.2174	2.2191
76	2.2032	2.2011	2.2	2.197	2.1915	2.1879	2.1854	2.1836	2.1862	2.192	2.2007	2.2078	2.2134	2.2179	2.2189	2.2176	2.2173	2.2168	2.2162	2.2166	2.2173	2.218	2.2211	2.2258	2.2314	2.2395	2.2487	2.2572	2.2656	2.2752	2.2884	2.2984	2.3062	2.3173	2.3251	2.3291	2.3337	2.3369	2.3383	2.341	2.3451	2.3511	2.3577	2.3629	2.3649	2.3681	2.3708	2.3708	2.3724
77	2.1345	2.1336	2.1252	2.1184	2.1161	2.1159	2.1184	2.124	2.1272	2.13	2.134	2.1373	2.1392	2.1384	2.1363	2.1331	2.1289	2.1217	2.1126	2.1098	2.11	2.1121	2.1162	2.121	2.1256	2.1322	2.1407	2.151	2.1615	2.1708	2.1764	2.1816	2.1867	2.1912	2.1954	2.1993	2.203	2.2069	2.2111	2.2173	2.2255	2.2363	2.2436	2.2492	2.2541	2.2576	2.2601	2.262	2.2643
78	2.3041	2.3025	2.2992	2.2957	2.2926	2.2909	2.2898	2.2892	2.2903	2.2924	2.2951	2.2987	2.3017	2.3014	2.3	2.2983	2.2969	2.2962	2.2959	2.2946	2.294	2.2952	2.2976	2.3009	2.3047	2.3139	2.3243	2.3302	2.3375	2.3465	2.3574	2.3678	2.3774	2.3856	2.3928	2.399	2.405	2.4097	2.4129	2.4148	2.4191	2.4281	2.4388	2.4482	2.4539	2.4593	2.4632	2.4644	2.4662
79	2.0099	2.0091	2.0029	1.9969	1.9926	1.989	1.9867	1.9864	1.9885	1.9921	1.9962	2.0012	2.0057	2.0073	2.0048	1.9998	1.9974	1.9929	1.9862	1.9808	1.9777	1.9773	1.9785	1.9802	1.9813	1.9844	1.9897	1.9972	2.0076	2.0193	2.03	2.0391	2.0469	2.0539	2.0596	2.0637	2.0633	2.0634	2.0664	2.0717	2.0789	2.0877	2.0968	2.1046	2.1099	2.1148	2.1181	2.1183	2.1165
80	2.0848	2.0826	2.0783	2.0727	2.0661	2.0594	2.0552	2.0553	2.0566	2.0586	2.0607	2.0663	2.0724	2.0745	2.0765	2.0782	2.0764	2.0752	2.0752	2.0751	2.0753	2.0758	2.0773	2.0789	2.08	2.0848	2.0922	2.1003	2.1101	2.1206	2.1302	2.1412	2.153	2.1634	2.1698	2.1722	2.1752	2.1782	2.182	2.1908	2.2015	2.2127	2.2214	2.2283	2.2341	2.2386	2.2414	2.2415	2.2416
81	2.0254	2.023	2.0224	2.0179	2.0087	2.0038	2.0036	2.0091	2.0121	2.0154	2.0218	2.0292	2.0361	2.0404	2.0413	2.0397	2.0377	2.0355	2.0331	2.0303	2.0285	2.0284	2.0305	2.0323	2.0317	2.0354	2.0421	2.05	2.0588	2.068	2.0772	2.085	2.0913	2.0972	2.1029	2.1082	2.1112	2.1141	2.1178	2.1219	2.1275	2.1352	2.1441	2.1522	2.1581	2.1616	2.1638	2.1661	2.167
82	2.0913	2.0889	2.0849	2.0807	2.0767	2.0713	2.0674	2.0669	2.0736	2.0832	2.0921	2.0977	2.101	2.1036	2.1026	2.0995	2.1003	2.1003	2.099	2.0978	2.0969	2.0967	2.1006	2.1061	2.1112	2.1217	2.1329	2.1382	2.1439	2.1513	2.1636	2.175	2.185	2.1938	2.201	2.207	2.213	2.2169	2.2185	2.2218	2.2285	2.2403	2.2547	2.2686	2.2797	2.2868	2.29	2.2891	2.2876
83	2.1385	2.1349	2.1298	2.1255	2.1224	2.1181	2.1166	2.1204	2.1231	2.1266	2.1325	2.1392	2.1453	2.1492	2.1501	2.149	2.149	2.1482	2.1466	2.1467	2.1457	2.1428	2.1442	2.1479	2.1525	2.1601	2.1687	2.1755	2.1837	2.1929	2.2023	2.2101	2.217	2.2257	2.2315	2.2341	2.2372	2.2405	2.2443	2.2505	2.2582	2.2674	2.2753	2.2818	2.2866	2.2902	2.2911	2.2875	2.2849
84	2.1697	2.1633	2.1561	2.1478	2.1391	2.1361	2.1349	2.1335	2.1339	2.1365	2.1426	2.1479	2.1517	2.1524	2.1506	2.1466	2.1411	2.1368	2.1339	2.1299	2.1293	2.1335	2.135	2.1365	2.1398	2.1461	2.1539	2.1613	2.1688	2.1762	2.1835	2.1906	2.1977	2.2062	2.2122	2.2153	2.2194	2.2232	2.2267	2.2329	2.2408	2.2504	2.2584	2.2647	2.269	2.2713	2.2718	2.2705	2.2692
85	2.5342	2.5213	2.5028	2.4861	2.4744	2.467	2.4644	2.4673	2.4741	2.4833	2.4931	2.4987	2.502	2.5065	2.5089	2.5089	2.5068	2.5033	2.4996	2.5003	2.5062	2.5172	2.5275	2.5386	2.551	2.5642	2.5788	2.596	2.6141	2.6329	2.6527	2.6704	2.6865	2.7037	2.7189	2.7316	2.7425	2.7536	2.766	2.7789	2.7931	2.8096	2.8308	2.8512	2.8667	2.8779	2.8852	2.8891	2.8938
86	2.8187	2.80515	2.79205	2.7773	2.76085	2.7467	2.73955	2.7432	2.74775	2.75445	2.76425	2.77375	2.78095	2.78215	2.77695	2.76815	2.7629	2.7583	2.7538	2.74955	2.7473	2.74775	2.75105	2.75525	2.75885	2.76855	2.7803	2.78845	2.80095	2.81605	2.8314	2.8444	2.85605	2.8705	2.8825	2.89115	2.89635	2.8987	2.89975	2.90855	2.92055	2.93385	2.94355	2.9515	2.959	2.96715	2.97315	2.9735	2.97245
87	3.02935	3.01955	3.0074	2.9945	2.98235	2.97745	2.97655	2.9785	2.98505	2.9937	3.00225	3.0074	3.0097	3.01025	3.00595	2.99775	2.98905	2.98045	2.97265	2.966	2.9646	2.96985	2.97695	2.9846	2.99135	3.0029	3.0165	3.02855	3.03935	3.0496	3.0605	3.07235	3.08455	3.09515	3.10575	3.1159	3.1212	3.12565	3.1312	3.1409	3.15155	3.1617	3.17445	3.18625	3.1941	3.2006	3.2057	3.20955	3.2102
88	2.3992	2.3951	2.3919	2.3881	2.3834	2.37915	2.37795	2.3818	2.38605	2.39125	2.39785	2.40095	2.40085	2.39765	2.3945	2.39115	2.38565	2.3801	2.375	2.3714	2.3676	2.3633	2.3625	2.3628	2.3627	2.3636	2.3672	2.37585	2.3858	2.397	2.40985	2.42105	2.4304	2.4381	2.44255	2.44355	2.4406	2.43835	2.43945	2.4443	2.4531	2.46655	2.47885	2.4892	2.49705	2.50185	2.5035	2.502	2.49725
89	2.64035	2.6285	2.6217	2.61295	2.6011	2.59575	2.59585	2.6021	2.611	2.621	2.63065	2.63715	2.64045	2.64065	2.63515	2.6252	2.61335	2.6045	2.59905	2.59045	2.58605	2.58835	2.59335	2.59885	2.60275	2.60965	2.6193	2.6311	2.6443	2.6586	2.67405	2.68965	2.7045	2.7167	2.72435	2.72725	2.7262	2.724	2.72285	2.72695	2.73695	2.75395	2.76985	2.7836	2.79415	2.80185	2.8056	2.8042	2.80125
90	2.26945	2.25985	2.2475	2.2376	2.23205	2.22795	2.22775	2.2329	2.23765	2.24295	2.2494	2.25645	2.26095	2.25695	2.2521	2.2467	2.23905	2.2311	2.22395	2.2204	2.2197	2.22135	2.22265	2.224	2.22535	2.23145	2.23985	2.24715	2.25655	2.26715	2.27745	2.2876	2.2975	2.30695	2.31365	2.3168	2.31515	2.31365	2.31495	2.3211	2.32895	2.3368	2.34955	2.362	2.3703	2.375	2.37665	2.37635	2.37265
91	2.3675	2.36205	2.35405	2.3485	2.3467	2.34445	2.34365	2.34555	2.3503	2.35585	2.3599	2.3646	2.36825	2.3682	2.36325	2.35595	2.3552	2.3516	2.3442	2.33755	2.3323	2.32905	2.3298	2.33115	2.3304	2.3343	2.34115	2.349	2.3585	2.3698	2.38435	2.39505	2.40225	2.4083	2.4126	2.4149	2.41365	2.4122	2.4126	2.4195	2.43005	2.44305	2.455	2.4648	2.47145	2.4753	2.4763	2.47495	2.4724
92	2.1526	2.14745	2.1448	2.139	2.1286	2.11915	2.1132	2.1132	2.11495	2.11755	2.1197	2.1255	2.1316	2.1321	2.13135	2.12925	2.1244	2.11985	2.11635	2.1138	2.11265	2.11305	2.1152	2.11955	2.12605	2.13405	2.14195	2.1473	2.155	2.16365	2.171	2.17935	2.1885	2.19785	2.205	2.2092	2.2106	2.2134	2.2191	2.22245	2.2282	2.23885	2.2476	2.25485	2.2607	2.26455	2.2661	2.265	2.26305
93	2.2677	2.2616	2.255	2.2504	2.2485	2.2453	2.24445	2.248	2.25435	2.26095	2.26545	2.26785	2.26845	2.26765	2.2623	2.25395	2.24735	2.24155	2.23645	2.23145	2.22805	2.22685	2.22825	2.23195	2.23765	2.2472	2.25875	2.27	2.2799	2.2894	2.30095	2.30815	2.3118	2.31635	2.3164	2.3121	2.3079	2.30655	2.30955	2.31335	2.32065	2.3329	2.34195	2.34905	2.355	2.36055	2.36365	2.3616	2.3612
94	2.0877	2.07805	2.06895	2.0573	2.04315	2.03635	2.03415	2.03585	2.042	2.0493	2.05455	2.0597	2.0641	2.0662	2.06605	2.0634	2.0561	2.0508	2.0481	2.0426	2.0389	2.0387	2.0398	2.04105	2.04155	2.04515	2.0511	2.05855	2.0686	2.0794	2.0874	2.0976	2.10925	2.1189	2.12585	2.13025	2.13365	2.1374	2.1424	2.14885	2.15855	2.17275	2.18405	2.19315	2.2005	2.2051	2.207	2.2064	2.2051
95	2.17665	2.1656	2.15315	2.1409	2.1295	2.119	2.1145	2.11945	2.1231	2.1281	2.1369	2.1444	2.1491	2.1486	2.1448	2.13925	2.1353	2.1319	2.1285	2.1224	2.1191	2.1205	2.12275	2.1248	2.12555	2.13145	2.1408	2.15135	2.1621	2.1738	2.1884	2.2016	2.2132	2.2239	2.2316	2.23585	2.235	2.23355	2.234	2.2405	2.2514	2.26645	2.2813	2.2935	2.30105	2.3066	2.3092	2.3074	2.30455
96	2.73365	2.72725	2.7179	2.7108	2.70775	2.7071	2.70925	2.71445	2.71885	2.72385	2.73095	2.73565	2.7365	2.7304	2.72125	2.71085	2.7026	2.69565	2.6903	2.68905	2.69045	2.6937	2.6969	2.7013	2.7077	2.7152	2.72385	2.73335	2.74535	2.75945	2.77535	2.7915	2.80765	2.82455	2.83835	2.84795	2.85125	2.85275	2.8549	2.8603	2.86905	2.88185	2.8962	2.90955	2.92005	2.9304	2.93815	2.9402	2.94025
97	2.41375	2.40235	2.3922	2.38235	2.37305	2.36725	2.36615	2.371	2.3778	2.3853	2.3919	2.398	2.40125	2.397	2.39075	2.38375	2.3769	2.3728	2.37125	2.3666	2.3635	2.36345	2.36355	2.3649	2.36825	2.37445	2.3829	2.3924	2.40485	2.4188	2.4318	2.44635	2.46165	2.4748	2.4838	2.4889	2.49465	2.49815	2.4993	2.5058	2.51585	2.5291	2.53985	2.54965	2.55975	2.56725	2.57215	2.5742	2.5762
98	2.46615	2.45465	2.4381	2.42715	2.4247	2.41985	2.41845	2.4236	2.43285	2.444	2.455	2.4609	2.46225	2.45905	2.45285	2.44495	2.43815	2.43045	2.42245	2.419	2.4172	2.41625	2.4199	2.42485	2.42865	2.4369	2.44735	2.45685	2.46875	2.4831	2.5009	2.5152	2.5265	2.5388	2.54735	2.5518	2.5536	2.5552	2.55835	2.5657	2.5764	2.5904	2.60605	2.6184	2.6236	2.62905	2.633	2.63365	2.6331
99	2.04555	2.0413	2.038	2.0346	2.0309	2.0271	2.0276	2.0354	2.03805	2.03855	2.03875	2.04265	2.04535	2.0375	2.0307	2.0251	2.01735	2.0113	2.0077	2.00635	2.00595	2.0061	2.0111	2.0169	2.0204	2.0283	2.0364	2.03905	2.0448	2.0528	2.0616	2.06855	2.07365	2.078	2.08115	2.08325	2.08415	2.0856	2.08855	2.0922	2.0996	2.11275	2.12265	2.12925	2.13245	2.1343	2.13445	2.1327	2.129
100	2.3844	2.3798	2.3787	2.3744	2.3659	2.36675	2.36925	2.3696	2.3718	2.37545	2.3805	2.3854	2.38835	2.3857	2.3821	2.3783	2.37425	2.37175	2.37075	2.36875	2.36955	2.37425	2.3749	2.3753	2.3781	2.38315	2.3904	2.3997	2.41025	2.4218	2.43495	2.44515	2.45285	2.46045	2.4654	2.4674	2.46695	2.46735	2.4705	2.4766	2.48545	2.49705	2.5103	2.52085	2.5254	2.52655	2.52485	2.521	2.5176
101	2.21545	2.2073	2.20085	2.1974	2.1972	2.1961	2.1935	2.1885	2.19035	2.1941	2.1953	2.1968	2.1979	2.1979	2.19295	2.18485	2.1792	2.17685	2.17745	2.17665	2.17645	2.17725	2.17615	2.17785	2.18575	2.1931	2.2005	2.20855	2.21815	2.23025	2.24765	2.2627	2.2747	2.2829	2.28895	2.29335	2.29475	2.29675	2.30075	2.30585	2.3138	2.32625	2.34085	2.3538	2.36205	2.3684	2.372	2.37175	2.37
102	2.3003	2.2928	2.28855	2.2856	2.28345	2.2809	2.28055	2.28415	2.28955	2.29585	2.3025	2.3029	2.3	2.2984	2.2942	2.28865	2.2856	2.28345	2.282	2.28195	2.2809	2.27815	2.2808	2.28465	2.28665	2.2907	2.29555	2.2996	2.30565	2.31345	2.323	2.3302	2.3358	2.3434	2.34835	2.3499	2.34825	2.3466	2.34705	2.3528	2.3607	2.3691	2.38035	2.39165	2.4011	2.40715	2.4103	2.4115	2.4085
103	2.266	2.26605	2.26155	2.25725	2.2544	2.25245	2.2516	2.2519	2.25125	2.25205	2.25755	2.25895	2.2572	2.2531	2.2487	2.2447	2.24285	2.23995	2.23615	2.23595	2.2367	2.2375	2.24085	2.24515	2.24935	2.25535	2.2616	2.2657	2.26915	2.2728	2.2784	2.2861	2.29495	2.30295	2.30795	2.30995	2.3113	2.31285	2.31545	2.32055	2.3256	2.329	2.33515	2.3414	2.34585	2.3489	2.34945	2.34615	2.3429
104	1.9569	1.949	1.93835	1.9286	1.9212	1.91815	1.91655	1.91485	1.92025	1.9286	1.9367	1.9442	1.9494	1.94945	1.94555	1.9389	1.9319	1.9248	1.9181	1.91415	1.9124	1.9125	1.9098	1.90865	1.912	1.91745	1.9251	1.93505	1.9432	1.95105	1.961	1.9713	1.9809	1.9868	1.9904	1.9923	1.99405	1.99775	2.0046	2.01525	2.0254	2.03255	2.04085	2.04755	2.05095	2.05035	2.04725	2.04365	2.0412
105	2.1235	2.11775	2.1119	2.09925	2.0793	2.0708	2.0672	2.0664	2.07115	2.0782	2.08445	2.0898	2.0944	2.0994	2.0984	2.09255	2.08655	2.0801	2.0729	2.0606	2.0519	2.0499	2.0486	2.05065	2.0579	2.06765	2.0788	2.08995	2.1013	2.1133	2.1274	2.1383	2.1461	2.1528	2.1575	2.1603	2.1627	2.1661	2.1714	2.17835	2.1885	2.20315	2.21695	2.22725	2.23165	2.2352	2.2367	2.23485	2.2312
106	2.42435	2.4195	2.41005	2.4019	2.39715	2.3975	2.39765	2.39495	2.3991	2.4062	2.41335	2.41785	2.42	2.4204	2.4176	2.4125	2.4082	2.40345	2.39885	2.3976	2.398	2.3993	2.40145	2.4045	2.4084	2.41455	2.42225	2.43105	2.4372	2.4436	2.4559	2.46555	2.47255	2.47925	2.48465	2.48845	2.4887	2.4898	2.4937	2.50095	2.5098	2.5193	2.5319	2.54215	2.5457	2.5483	2.54965	2.5496	2.5469
107	2.3745	2.3742	2.3724	2.36995	2.3673	2.3647	2.36275	2.3621	2.36195	2.36155	2.35975	2.35815	2.3569	2.35645	2.35535	2.35315	2.3483	2.34415	2.34155	2.34105	2.3401	2.3379	2.3382	2.3397	2.3415	2.3442	2.3494	2.3594	2.3681	2.376	2.38345	2.3937	2.4057	2.41605	2.42185	2.42295	2.4232	2.4233	2.42415	2.428	2.4336	2.4406	2.4497	2.4585	2.4653	2.4703	2.4728	2.4717	2.47095
108	2.3287	2.32115	2.3139	2.3072	2.30125	2.2962	2.29385	2.2955	2.29975	2.3044	2.3072	2.30775	2.307	2.307	2.3006	2.2903	2.28465	2.28075	2.27835	2.2798	2.28005	2.27715	2.27925	2.28335	2.2873	2.29535	2.3056	2.31565	2.32715	2.3412	2.361	2.3771	2.38925	2.4001	2.40495	2.40435	2.40565	2.40515	2.4027	2.4076	2.41835	2.4348	2.4503	2.46315	2.47175	2.4781	2.4815	2.481	2.4794
109	2.35435	2.347	2.33955	2.3328	2.32705	2.32025	2.3173	2.3211	2.3234	2.32725	2.3357	2.34015	2.3416	2.3413	2.3395	2.33645	2.3319	2.3276	2.3238	2.32025	2.3177	2.3164	2.3158	2.3162	2.31765	2.3208	2.32625	2.3346	2.3462	2.35885	2.36925	2.37955	2.38945	2.3986	2.40275	2.4018	2.40055	2.3993	2.39935	2.4058	2.4149	2.4249	2.43325	2.43985	2.4447	2.44695	2.4468	2.44415	2.4419
110	2.23395	2.22455	2.2172	2.20695	2.1937	2.18975	2.18685	2.1811	2.18015	2.1833	2.191	2.1966	2.2007	2.2049	2.20365	2.19795	2.19075	2.18585	2.18355	2.1795	2.1779	2.1802	2.1811	2.1832	2.188	2.19345	2.20165	2.2151	2.23015	2.24615	2.26265	2.2762	2.28725	2.2982	2.3058	2.30975	2.31025	2.3086	2.3066	2.3121	2.32405	2.3425	2.35795	2.3711	2.38185	2.3898	2.39495	2.39735	2.39605
111	2.11875	2.11055	2.1021	2.09435	2.0878	2.084	2.0811	2.07815	2.07665	2.07755	2.08235	2.08495	2.08635	2.0884	2.08855	2.0874	2.0871	2.0872	2.0872	2.0838	2.0805	2.07885	2.0774	2.0767	2.07705	2.07965	2.08385	2.089	2.09905	2.1118	2.124	2.13505	2.144	2.14745	2.1498	2.15175	2.15185	2.1504	2.14805	2.14985	2.15435	2.16105	2.1689	2.176	2.18105	2.1832	2.1838	2.1849	2.1835
112	2.1689	2.1606	2.151	2.1432	2.1381	2.1323	2.1265	2.1208	2.12125	2.12575	2.1331	2.1357	2.1349	2.13255	2.1291	2.1249	2.1208	2.1159	2.11035	2.10465	2.1007	2.09915	2.0952	2.0929	2.095	2.09925	2.10455	2.1095	2.11775	2.12825	2.1396	2.1479	2.1536	2.1595	2.1628	2.1633	2.16085	2.1594	2.1605	2.1629	2.1678	2.1762	2.18555	2.1935	2.1981	2.20065	2.20015	2.19525	2.1915
113	2.5842	2.5793	2.57295	2.5659	2.55835	2.5512	2.54595	2.5438	2.5449	2.54895	2.5562	2.5615	2.5645	2.56415	2.56285	2.56085	2.5586	2.5552	2.5501	2.54185	2.53455	2.53005	2.5271	2.52805	2.53425	2.54315	2.55485	2.56955	2.58535	2.60265	2.6238	2.6403	2.6524	2.66335	2.6726	2.6798	2.6809	2.6819	2.68565	2.69085	2.69925	2.71205	2.72625	2.73865	2.7465	2.7543	2.7604	2.76325	2.763
114	2.60135	2.5886	2.57295	2.5583	2.54645	2.5389	2.5371	2.54265	2.5528	2.5642	2.5736	2.581	2.58585	2.58745	2.58355	2.57555	2.56655	2.55735	2.5486	2.5421	2.5378	2.5357	2.53615	2.53985	2.5472	2.5556	2.5654	2.5767	2.5926	2.61065	2.62735	2.64225	2.6557	2.6694	2.68015	2.687	2.6876	2.6883	2.69175	2.69545	2.7033	2.71785	2.7311	2.74265	2.75175	2.75815	2.7623	2.76465	2.76355
115	2.48705	2.47765	2.46605	2.45535	2.44705	2.44315	2.4412	2.4401	2.44345	2.44955	2.4571	2.4642	2.46885	2.46645	2.46555	2.46455	2.45605	2.4473	2.44005	2.43575	2.4325	2.4295	2.428	2.43015	2.4377	2.44805	2.4587	2.4655	2.4797	2.49765	2.5135	2.53015	2.54645	2.55905	2.5679	2.57275	2.5716	2.57085	2.5734	2.577	2.5846	2.59785	2.6131	2.6273	2.63815	2.64525	2.64905	2.65015	2.64805
116	2.252	2.2471	2.2407	2.2376	2.2387	2.2344	2.2305	2.2297	2.2303	2.2341	2.2435	2.2503	2.2531	2.2488	2.2397	2.2283	2.221	2.2141	2.2075	2.2045	2.2015	2.1975	2.1989	2.2027	2.2066	2.2148	2.2242	2.2302	2.2395	2.2505	2.2604	2.2704	2.2799	2.2872	2.2931	2.2976	2.2996	2.3005	2.3017	2.3086	2.3174	2.3264	2.3352	2.3447	2.3558	2.3629	2.3657	2.3637	2.3586
117	2.2618	2.2527	2.24315	2.23625	2.2332	2.23225	2.23395	2.2386	2.24225	2.24635	2.2525	2.25595	2.2561	2.251	2.2449	2.23795	2.22825	2.2202	2.2148	2.21215	2.2114	2.21225	2.2137	2.2162	2.2198	2.2267	2.2348	2.2412	2.2496	2.2596	2.2704	2.28465	2.30085	2.31455	2.32445	2.33055	2.334	2.33745	2.34225	2.34905	2.358	2.3693	2.38245	2.39565	2.40765	2.4162	2.42085	2.42135	2.42125
118	2.23945	2.2305	2.2198	2.2107	2.20495	2.2052	2.20875	2.21425	2.21855	2.2219	2.22415	2.2281	2.2317	2.23125	2.22805	2.2231	2.2187	2.213	2.2064	2.2035	2.20265	2.20325	2.2042	2.2066	2.2111	2.2168	2.22335	2.2303	2.23925	2.2483	2.25435	2.25995	2.26605	2.2756	2.28245	2.2857	2.28735	2.28915	2.2921	2.29645	2.302	2.3086	2.3134	2.31745	2.3211	2.32435	2.32655	2.32635	2.3256
119	2.13485	2.1291	2.1222	2.11585	2.11095	2.1092	2.10925	2.1105	2.11625	2.12305	2.1278	2.1298	2.1288	2.1235	2.1164	2.10895	2.1045	2.10085	2.09795	2.09705	2.09795	2.10045	2.10395	2.10835	2.11365	2.1207	2.1275	2.13105	2.1398	2.15205	2.16545	2.1812	2.19795	2.21285	2.22325	2.22915	2.23435	2.23855	2.242	2.24685	2.25385	2.264	2.2759	2.28685	2.29485	2.30025	2.3028	2.302	2.30025
120	2.3626	2.35655	2.3517	2.34515	2.33645	2.33295	2.3311	2.3294	2.3299	2.33335	2.34135	2.34495	2.3463	2.3495	2.34875	2.34485	2.34115	2.3377	2.3344	2.33075	2.32775	2.32595	2.3273	2.3301	2.33315	2.33665	2.34185	2.35075	2.36145	2.3726	2.3816	2.3906	2.39935	2.40725	2.41185	2.41355	2.41765	2.42	2.41995	2.4253	2.4336	2.4442	2.45515	2.46465	2.47105	2.4752	2.47715	2.47685	2.4746
121	1.99085	1.98585	1.9778	1.969	1.96035	1.95305	1.948	1.94595	1.9424	1.94055	1.9436	1.94585	1.94775	1.9502	1.9513	1.9511	1.9504	1.9486	1.94595	1.9446	1.9427	1.93975	1.9368	1.9344	1.93265	1.9338	1.9375	1.9431	1.9508	1.96055	1.9732	1.9821	1.98765	1.9937	1.9975	1.99875	1.99595	1.9943	1.99605	2.00085	2.00875	2.01985	2.02965	2.0364	2.0384	2.0399	2.04025	2.03875	2.035
122	1.99315	1.98675	1.98145	1.9726	1.96025	1.9591	1.9616	1.96465	1.968	1.972	1.9772	1.97985	1.97965	1.9754	1.9691	1.96145	1.95315	1.9474	1.94435	1.93945	1.938	1.94155	1.9437	1.94635	1.9502	1.9583	1.9672	1.9719	1.978	1.98475	1.99095	1.99665	2.00215	2.00915	2.0136	2.01525	2.0163	2.0164	2.01635	2.0213	2.0293	2.03945	2.04865	2.05605	2.06105	2.0663	2.06925	2.0663	2.06235
123	2.74235	2.72925	2.71685	2.7028	2.68715	2.67625	2.6724	2.6782	2.68325	2.6904	2.7027	2.71455	2.7235	2.72515	2.72355	2.719	2.7096	2.7006	2.6933	2.6876	2.6842	2.68305	2.6825	2.68445	2.6901	2.70035	2.71345	2.7269	2.7419	2.7579	2.77445	2.7904	2.80575	2.821	2.83235	2.83905	2.8408	2.8414	2.8435	2.8517	2.8627	2.8753	2.8877	2.89865	2.90705	2.91265	2.9159	2.9176	2.91695
124	1.99325	1.98605	1.9779	1.96705	1.95345	1.94065	1.93195	1.93	1.9339	1.94145	1.95135	1.9549	1.9548	1.9558	1.955	1.9531	1.9525	1.9501	1.94535	1.93925	1.93315	1.92805	1.92945	1.9338	1.93875	1.9426	1.9471	1.9545	1.96055	1.9668	1.97695	1.9823	1.98415	1.9882	1.99125	1.99325	1.99795	2.0024	2.00585	2.0123	2.02045	2.03	2.03965	2.0469	2.0498	2.0515	2.0506	2.0453	2.0416
125	2.77785	2.76385	2.75085	2.73775	2.72465	2.71295	2.70875	2.71635	2.72365	2.73215	2.74315	2.7516	2.7563	2.7548	2.75005	2.7428	2.7327	2.7251	2.72075	2.7165	2.71405	2.71435	2.719	2.7268	2.73655	2.7506	2.76625	2.7797	2.79175	2.8019	2.80855	2.8188	2.8319	2.8442	2.852	2.8555	2.8584	2.8632	2.8717	2.88435	2.8986	2.91275	2.9245	2.93505	2.94525	2.9504	2.95145	2.94975	2.9483
126	2.26885	2.25825	2.24995	2.2393	2.22585	2.2171	2.21195	2.2104	2.2171	2.2256	2.22995	2.23475	2.2384	2.23785	2.2367	2.23415	2.2261	2.2192	2.2144	2.20875	2.20395	2.20065	2.1985	2.1987	2.2019	2.2054	2.21005	2.21705	2.2266	2.23725	2.24695	2.25495	2.26165	2.269	2.2727	2.2724	2.27035	2.2694	2.27095	2.2731	2.2763	2.2806	2.2874	2.2942	2.29925	2.3019	2.30255	2.30185	2.30075
127	2.25545	2.24635	2.23485	2.22205	2.20875	2.19945	2.19275	2.18855	2.1891	2.1926	2.1978	2.2022	2.20515	2.2053	2.2024	2.1974	2.19295	2.1892	2.1861	2.1831	2.18165	2.1824	2.18195	2.18315	2.1878	2.19535	2.20405	2.2109	2.2204	2.231	2.24065	2.2489	2.25565	2.25965	2.26425	2.2698	2.27415	2.27885	2.28465	2.29205	2.30305	2.31915	2.3345	2.34665	2.35345	2.35585	2.35565	2.3558	2.3526
128	2.48695	2.4791	2.47505	2.4724	2.46995	2.4608	2.45665	2.46455	2.46945	2.47455	2.4825	2.4871	2.4889	2.4888	2.48745	2.48395	2.4733	2.4655	2.4618	2.45725	2.4518	2.4457	2.4471	2.4498	2.4493	2.45035	2.45425	2.46285	2.46925	2.4743	2.47925	2.48565	2.49265	2.498	2.50165	2.5041	2.50825	2.51235	2.51625	2.52325	2.5302	2.5355	2.54415	2.5513	2.5533	2.55435	2.55405	2.55185	2.551
129	2.29025	2.28145	2.2719	2.2604	2.24715	2.2395	2.2345	2.23115	2.23275	2.237	2.2422	2.2453	2.2475	2.25135	2.2517	2.2493	2.24745	2.2464	2.24575	2.242	2.23875	2.23725	2.23525	2.2343	2.2354	2.23765	2.24265	2.25265	2.2632	2.27325	2.2812	2.2894	2.29745	2.3037	2.30595	2.3043	2.3018	2.29965	2.29895	2.30215	2.30815	2.3165	2.3231	2.32865	2.3336	2.3373	2.33805	2.3337	2.33015
130	2.18055	2.1749	2.1678	2.16055	2.15395	2.15365	2.1537	2.1509	2.1528	2.1568	2.161	2.1653	2.16745	2.1632	2.15565	2.14715	2.14365	2.1392	2.1335	2.1316	2.13235	2.1353	2.1385	2.1417	2.1443	2.1522	2.16255	2.1715	2.1834	2.19745	2.21335	2.2253	2.2342	2.24565	2.2532	2.25655	2.2605	2.2636	2.2662	2.27255	2.2832	2.2989	2.31165	2.32155	2.3284	2.3333	2.3354	2.3333	2.33325
131	2.04945	2.0419	2.03585	2.0286	2.01965	2.01265	2.0083	2.0074	2.00825	2.01235	2.02195	2.02855	2.0325	2.0341	2.03465	2.0343	2.0326	2.03005	2.0266	2.0207	2.01455	2.0093	2.00775	2.00775	2.00765	2.0112	2.01645	2.02075	2.026	2.0321	2.0389	2.0441	2.0482	2.05395	2.0585	2.06185	2.06875	2.07345	2.0739	2.07325	2.07445	2.0795	2.0851	2.0896	2.09155	2.09455	2.0971	2.0968	2.099
132	2.04495	2.0381	2.0295	2.0216	2.01515	2.01	2.0062	2.00415	2.00965	2.0183	2.02655	2.03265	2.03635	2.0372	2.035	2.03065	2.02635	2.02105	2.0148	2.00885	2.00375	1.9999	1.99735	1.9975	2.00105	2.0055	2.01085	2.01705	2.02215	2.0282	2.03915	2.0481	2.05485	2.06095	2.06515	2.0673	2.06675	2.06685	2.0689	2.07175	2.07495	2.0783	2.08485	2.0914	2.0959	2.09875	2.09975	2.0988	2.09685
133	2.79555	2.78415	2.771	2.76125	2.7564	2.7512	2.7466	2.743	2.746	2.75225	2.7591	2.76445	2.76715	2.76455	2.75795	2.7491	2.7413	2.73395	2.7273	2.72415	2.72305	2.7235	2.72545	2.72925	2.735	2.74305	2.75415	2.7694	2.7825	2.795	2.81	2.82345	2.83555	2.84745	2.8579	2.8662	2.8693	2.87165	2.87565	2.88345	2.89375	2.906	2.9175	2.9278	2.93635	2.9446	2.9517	2.9564	2.95725
134	2.6338	2.62755	2.61835	2.6061	2.5918	2.58785	2.5854	2.5802	2.57955	2.58365	2.5943	2.60105	2.6049	2.60775	2.6087	2.60745	2.60275	2.596	2.58795	2.58045	2.57715	2.5791	2.57695	2.57635	2.58115	2.58815	2.5967	2.6053	2.61845	2.6344	2.6507	2.6654	2.67865	2.69295	2.7033	2.70915	2.71205	2.715	2.71945	2.7226	2.7302	2.74575	2.76215	2.7765	2.7865	2.79615	2.8029	2.80315	2.80445
135	2.5059	2.4939	2.48345	2.4725	2.4611	2.45255	2.4483	2.44975	2.45505	2.46265	2.47135	2.4786	2.48305	2.4819	2.47865	2.47265	2.45985	2.44885	2.4411	2.4317	2.4257	2.42475	2.42645	2.4291	2.43125	2.44065	2.4541	2.4675	2.47995	2.49125	2.50135	2.5113	2.52085	2.52815	2.5357	2.54325	2.54675	2.55035	2.5561	2.56625	2.57815	2.59055	2.6044	2.61635	2.62395	2.62835	2.6303	2.63105	2.6291
136	2.01025	2.00305	1.9925	1.98285	1.9756	1.9686	1.9641	1.96335	1.9621	1.96235	1.9661	1.9714	1.9763	1.9777	1.9764	1.97325	1.9704	1.96705	1.96315	1.9603	1.9591	1.9594	1.95815	1.95515	1.95005	1.95085	1.9546	1.95755	1.96425	1.974	1.98675	2.0001	2.01315	2.0244	2.03225	2.03675	2.039	2.03935	2.0386	2.03865	2.0407	2.0458	2.05345	2.0619	2.0697	2.0753	2.0789	2.0806	2.08255
137	2.2486	2.2396	2.23075	2.22365	2.21895	2.2145	2.21165	2.2112	2.21475	2.2208	2.2287	2.23315	2.2346	2.2342	2.2264	2.21335	2.20175	2.19255	2.1862	2.18285	2.18135	2.18115	2.18445	2.18955	2.19505	2.20465	2.2172	2.23145	2.24275	2.25385	2.27055	2.28365	2.29375	2.30475	2.314	2.321	2.3244	2.3259	2.3269	2.33295	2.3415	2.35145	2.3656	2.37765	2.3828	2.3884	2.39365	2.3978	2.3974
138	2.2731	2.26495	2.2523	2.2412	2.2336	2.22315	2.21395	2.2083	2.2064	2.20805	2.2137	2.21915	2.22315	2.22375	2.22245	2.2195	2.2144	2.20835	2.202	2.19685	2.1936	2.19255	2.1911	2.19125	2.19435	2.201	2.2093	2.21645	2.22735	2.23995	2.2508	2.26155	2.27215	2.2824	2.29065	2.2964	2.299	2.3009	2.3034	2.30765	2.3156	2.3287	2.3406	2.35155	2.3615	2.36865	2.3724	2.37205	2.37065
139	2.1489	2.14165	2.1331	2.12675	2.1236	2.11905	2.1172	2.1204	2.1215	2.1237	2.13015	2.13345	2.13395	2.13215	2.12755	2.12045	2.11135	2.1046	2.10075	2.09685	2.09505	2.09595	2.0976	2.1006	2.10505	2.1131	2.12265	2.13095	2.13625	2.14045	2.1466	2.1541	2.16155	2.16445	2.1667	2.16875	2.1669	2.166	2.16795	2.17125	2.176	2.18235	2.1927	2.2031	2.2105	2.21535	2.21805	2.21945	2.21775
140	2.1856	2.1797	2.17	2.1636	2.16255	2.1626	2.16345	2.16485	2.16875	2.17375	2.1792	2.1801	2.1773	2.17225	2.16405	2.15375	2.1444	2.13555	2.12785	2.1247	2.1232	2.1222	2.1248	2.1285	2.1314	2.1373	2.1454	2.15425	2.16475	2.17685	2.191	2.20325	2.2139	2.22555	2.23315	2.23585	2.23545	2.23365	2.23215	2.2355	2.24345	2.25615	2.27095	2.28435	2.2935	2.30225	2.3082	2.30865	2.30805
[truncated: 952 more columns]
