# Supplementary material for: Rapid estimation of soil water content based on hyperspectral reflectance combined with continuous wavelet transform, feature extraction, and extreme learning machine
Source: PeerJ. 2024 Aug 22;12:e17954. doi: 10.7717/peerj.17954 (PMC11345001; doi:10.7717/peerj.17954)
Supplement: Supplemental Information 3 [file peerj-12-17954-s003.xlsx]

## Sheet: Sheet1
Samples	soil water content
1	36.8827
2	32.0734
3	38.6874
4	37.7684
5	41.6775
6	47.877
7	34.7746
8	34.0526
9	36.0611
10	36.7893
11	35.0524
12	36.8687
13	43.1341
14	36.558
15	45.849
16	23.3645
17	33.8741
18	34.1706
19	22.297
20	41.1321
21	40.4482
22	33.0125
23	41.7812
24	39.2877
25	36.0058
26	40.3561
27	29.9726
28	39.1802
29	23.9212
30	22.0383
31	26.1322
32	25.1328
33	31.9114
34	26.5591
35	22.8204
36	29.9257
37	30.4036
38	31.59
39	23.9386
40	23.2856
41	22.7862
42	25.208
43	32.4219
44	26.9527
45	27.8152
46	23.3281
47	31.791
48	28.8736
49	32.0872
50	34.2375
51	33.1514
52	26.9231
53	28.9106
54	32.913
55	29.4118
56	21.7901
57	32.3661
58	33.5606
59	31.7183
60	29.9028
61	31.6239
62	32.9676
63	33.125
64	25.4363
65	23.5743
66	37.6557
67	27.1064
68	25.6151
69	36.2899
70	32.8181
71	30.8497
72	37.4146
73	38.628
74	33.3333
75	28.1034
76	27.3279
77	36.2409
78	32.2379
79	40.218
80	27.3295
81	30.3767
82	34.1857
83	39.4624
84	29.0964
85	6.62106
86	19.1576
87	19.0476
88	22.1612
89	20.6653
90	19.1935
91	22.2476
92	21.8536
93	20.4059
94	20.5506
95	19.6482
96	14.9685
97	20.2749
98	20.3649
99	26.6104
100	22.7138
101	15.4867
102	27.8198
103	28.8694
104	34.0605
105	20.3152
106	21.2243
107	25.8002
108	13.4761
109	21.6838
110	14.8986
111	30.1562
112	26.6942
113	19.0626
114	15.5819
115	18.4984
116	21.7077
117	17.549
118	26.4996
119	15.654
120	21.0717
121	28.8897
122	37.1946
123	18.8325
124	27.6603
125	18.1508
126	32.2039
127	19.2397
128	31.9895
129	32.6715
130	16.1698
131	30.7387
132	42.4528
133	13.9385
134	16.4567
135	17.9865
136	27.8846
137	22.0276
138	21.173
139	40.0084
140	19.5052
